# Supplementary material for: Differential immunological profiles herald magnetic resonance imaging-defined perioperative cerebral infarction
Source: PubMed Central journal article supplement — Ther Adv Neurol Disord. 2018 Mar 13;11:1756286418759493. doi: 10.1177/1756286418759493 (PMC5858684; doi:10.1177/1756286418759493), 2018-03-13

## **Differential immunological profiles herald MRI-defined perioperative cerebral infarction**

Jonathon P. Fanning, BSc, MBBS, PhD <sup>1,2,3\*</sup>; Louise E. See Hoe, BBiomed Sci, PhD <sup>1,2</sup>; Margaret R. Passmore, BSc (Hons) <sup>1,2</sup>; Adrian G. Barnett, BSc, PhD <sup>4</sup>; Barbara E. Rolfe, BSc, PhD <sup>5</sup>; Jonathan E. Millar, MBBS <sup>1,2,6</sup>; Allan J. Wesley, MBChB, FRANZCR <sup>3</sup>; Jacky Suen, BSc, PhD <sup>1,2</sup>; John F. Fraser, MBChB, PhD, FRCP (Glasgow), FFARCSI, FRCA, FCICM <sup>1,2,3</sup>

<sup>1</sup> Critical Care Research Group, The Prince Charles Hospital, Brisbane, Queensland, Australia

<sup>2</sup> Faculty of Medicine, The University of Queensland, Brisbane, Queensland, Australia

<sup>3</sup> Metro North Hospital and Health Service District, Queensland, Australia

<sup>4</sup> School of Public Health and Social Work, Queensland University of Technology, Brisbane, Queensland, Australia

<sup>5</sup> Australian Institute for Bioengineering & Nanotechnology, The University of Queensland, Brisbane, Queensland, Australia

<sup>6</sup> Wellcome-Wolfson Centre for Experimental Medicine, Queen's University, Belfast, United Kingdom

Corresponding author: Jonathon P Fanning, BSc, MBBS, Critical Care Research Group, Level 3 Clinical Sciences Building, The Prince Charles Hospital, Rode Road, Chermside, Brisbane, Queensland 4032, Australia. Telephone: +61 7 3139 6880. Fax: +61 3139 6120. E-mail: [Jonathon\\_fanning@me.com](mailto:Jonathon_fanning@me.com).

**Supplementary Table 1:** Summary of longitudinal regression parameters

**Supplementary Figure 1:** Best-fit polynomial curves generated by smoothing model

**Supplementary Table 1:** Summary of longitudinal regression parameters. \*  $P < 0.05$ ; \*\*  $P < 0.001$ .

| Analyte                              | Stroke        |                     | Time           |                       | Constant (intercept) |                        |
|--------------------------------------|---------------|---------------------|----------------|-----------------------|----------------------|------------------------|
|                                      | Mean          | 95% CI              | Mean           | 95% CI                | Mean                 | 95% CI                 |
| <b>Routine Laboratory Tests</b>      |               |                     |                |                       |                      |                        |
| <b>WBC</b>                           | 1.19          | -0.47, 2.85         | -0.12          | -0.29, 0.05           | <b>2.36**</b>        | <b>1.00, 3.74</b>      |
| <b>Neutrophils</b>                   | 0.71          | -1.17, 2.55         | <b>-0.19*</b>  | <b>-0.37, -0.0001</b> | <b>2.85**</b>        | <b>1.34, 4.38</b>      |
| <b>Lymphocytes</b>                   | 0.12          | -0.24, 0.47         | <b>0.06**</b>  | <b>0.02, 0.09</b>     | <b>-0.56**</b>       | <b>-0.85, -0.26</b>    |
| <b>Monocytes</b>                     | 0.03          | -0.13, 0.2          | <b>0.03**</b>  | <b>0.01, 0.06</b>     | 0.09                 | -0.06, 0.23            |
| <b>Creatinine</b>                    | 3.64          | -13.26, 20.64       | -0.5           | -1.74, 0.77           | -2.05                | -15.16, 11.08          |
| <b>Haemoglobin</b>                   | -0.5          | -10.15, 9.17        | <b>-1.18**</b> | <b>-1.68, -0.68</b>   | <b>-12.27**</b>      | -19.42, -5.11          |
| <b>Platelets</b>                     | -2.01         | -25.41, 21.38       | <b>-2.61**</b> | <b>-3.86, -1.36</b>   | <b>-33.60**</b>      | -51.32, -15.85         |
| <b>Complement Cascade Components</b> |               |                     |                |                       |                      |                        |
| <b>C2</b>                            | -1284.83      | -6042.71, 3452.13   | 113.74         | -281.01, 549.6        | 1878.78              | -1864.52, 5662.34      |
| <b>C4b</b>                           | -552.74       | -1721.78, 599.43    | 8.42           | -121.65, 140.75       | 638.36               | -353.78, 1632.15       |
| <b>C5</b>                            | -25175.41     | -63137.31, 12433.22 | 276.21         | -3294.52, 3644.21     | -11651.34            | -41888.09, 18559.68    |
| <b>C5a</b>                           | 948.93        | -578.43, 2470.03    | -18.45         | -166.37, 133.42       | -38.84               | -1286.72, 1212.08      |
| <b>C9</b>                            | 64.97         | -277, 406.95        | 52.28          | -8.07, 112.64         | -169.03              | -539.64, 201.57        |
| <b>Factor D</b>                      | 8.9           | -6.16, 23.30        | -0.5           | -2.91, 2.32           | -7.22                | -23.33, 8.17           |
| <b>MBL</b>                           | -31.03        | -2294.5, 2229.89    | 99.35          | -82.3, 279.47         | -582.71              | -2348.17, 1183.11      |
| <b>C1q</b>                           | 1.33          | -10.36, 12.8        | 0.94           | -0.57, 2.52           | -9.09                | -19.83, 1.54           |
| <b>C3</b>                            | <b>21.79*</b> | <b>1.19, 42.24</b>  | <b>2.03*</b>   | <b>0.28, 3.9</b>      | <b>-38.44**</b>      | <b>-54.74, -21.98</b>  |
| <b>C3b/iC3b</b>                      | 201.97        | -251.51, 653.56     | -36.36         | -89.98, 18.03         | 148.61               | -247.81, 545.04        |
| <b>C4</b>                            | 43.17         | -76.68, 159.75      | <b>17.33*</b>  | <b>0.28, 35.03</b>    | <b>-133.86*</b>      | <b>-248.67, -21.06</b> |

|                                   |                |                      |              |                    |                  |                        |
|-----------------------------------|----------------|----------------------|--------------|--------------------|------------------|------------------------|
| <b>Factor B</b>                   | 20.87          | 2.87, 44.27          | <b>5.28*</b> | <b>2.05, 10.23</b> | <b>-38.37*</b>   | <b>-70.37, -6.80</b>   |
| <b>Factor H</b>                   | 16.28          | -44.00, 75.61        | 2.74         | -4.98, 10.87       | <b>-59.06*</b>   | <b>-114.33, -4.21</b>  |
| <b>Properdin</b>                  | -1.93          | -6.42, 2.54          | 0.04         | -0.48, 0.58        | -2.83            | -6.75, 1.10            |
| <b>Cytokines / Chemokines</b>     |                |                      |              |                    |                  |                        |
| <b>EOTAXIN</b>                    | -27.65         | -56.51, 0.93         | 2.01         | -2.0, 6.48         | <b>-37.17*</b>   | <b>-65.66, -9.01</b>   |
| <b>GM-CSF</b>                     | -9.11          | -20.04, 1.95         | -0.93        | -2.38, 0.56        | 3.84             | -6.27, 13.95           |
| <b>IFN<math>\alpha</math>2</b>    | -23.55         | -55.14, 8.32         | -2.75        | -6.77, 1.38        | 11.63            | -17.04, 40.28          |
| <b>IFN<math>\gamma</math></b>     | <b>-14.17*</b> | <b>-27.80, -0.57</b> | -0.45        | -1.01, 0.12        | 2.27             | -7.6, 12.18            |
| <b>IL-10</b>                      | 9.12           | -7.27, 25.38         | -1.02        | -3.55, 1.58        | 9.08             | -7.26, 25.40           |
| <b>IL-12p40</b>                   | -11.65         | -25.77, 2.67         | -1.45        | -3.60, 0.75        | 6.54             | -7.49, 20.53           |
| <b>IL-12p70</b>                   | -4.85          | -14.89, 5.19         | -0.002       | -0.25, 0.25        | 0.02             | -7.14, 7.19            |
| <b>IL-13</b>                      | -17.26         | -44.34, 9.89         | 0.54         | -1.96, 2.90        | -2.92            | -24.50, 18.52          |
| <b>IL-15</b>                      | -1.74          | -4.71, 1.25          | -0.18        | -0.49, 0.14        | 0.89             | -1.62, 3.40            |
| <b>IL-17</b>                      | -0.74          | -1.73, 0.26          | -0.07        | -0.22, 0.09        | 0.32             | -0.67, 1.31            |
| <b>IL-1<math>\alpha</math></b>    | 21.73          | -63.19,<br>107.11    | 0.81         | -2.94, 4.74        | -47.38           | -109.52, 14.64         |
| <b>IL-1b</b>                      | -1.54          | -4.40, 1.34          | -0.28        | -0.65, 0.10        | 1.06             | -1.42, 3.54            |
| <b>IL-2</b>                       | -6.49          | -15.34, 2.37         | -0.45        | -1.14, 0.28        | 1.66             | -5.23, 8.58            |
| <b>IL-4</b>                       | -12.74         | -31.94, 6.04         | -2.01        | -5.33, 1.37        | 7.49             | -13.18, 28.08          |
| <b>IL-5</b>                       | -5.52          | -14.86, 3.84         | 0.32         | -0.43, 1.03        | -1.55            | -8.84, 5.70            |
| <b>IL-6</b>                       | 18.24          | -21.03, 57.30        | -2.07        | -6.68, 2.63        | 29.95            | -4.25, 64.15           |
| <b>IL-7</b>                       | -6.02          | -13.03, 0.99         | -0.42        | -0.99, 0.15        | 2.21             | -3.28, 7.70            |
| <b>IL-8</b>                       | 4.62           | -5.69, 14.90         | 0.28         | -0.24, 0.82        | -5.25            | -12.82, 2.36           |
| <b>IP-10</b>                      | -18.06         | -263.97,<br>229.84   | 11.77        | -4.17, 28.77       | -135.04          | -321.63, 51.41         |
| <b>MCP-1</b>                      | 41.50          | -102.08,<br>183.29   | 19.52        | 0.18, 39.76        | <b>-183.31**</b> | <b>-316.52, -50.55</b> |
| <b>MIP-1<math>\alpha</math></b>   | -3.23          | -6.47, 0.003         | -0.27        | -0.57, 0.02        | 1.16             | -1.43, 3.76            |
| <b>MIP-1<math>\beta</math></b>    | <b>-10.60*</b> | <b>-20.67, -0.47</b> | -0.93        | -2.21, 0.34        | 4.69             | -4.35, 13.73           |
| <b>TNF<math>\alpha</math></b>     | -2.49          | -5.54, 0.25          | -0.17        | -0.64, 0.41        | 0.38             | -3.26, 4.00            |
| <b>Other Inflammatory markers</b> |                |                      |              |                    |                  |                        |

|               |           |                        |                 |                       |           |                        |
|---------------|-----------|------------------------|-----------------|-----------------------|-----------|------------------------|
| <b>MMP9</b>   | 63,842.96 | 28045.06,<br>111336.10 | 4205.66         | -4527.31,<br>12059.52 | -34555.77 | -97806.44,<br>28959.57 |
| <b>hs-CRP</b> | 3450.97   | -2131.64,<br>9044.96   | <b>598.24**</b> | <b>289.04, 906.20</b> | 2183.38   | -2063.39,<br>6422.49   |

**Supplementary Figure 1:** Best-fit polynomial curves generated by smoothing model. Red represents cases, blue controls and grey 95% confidence interval.

### High-sensitivity CRP

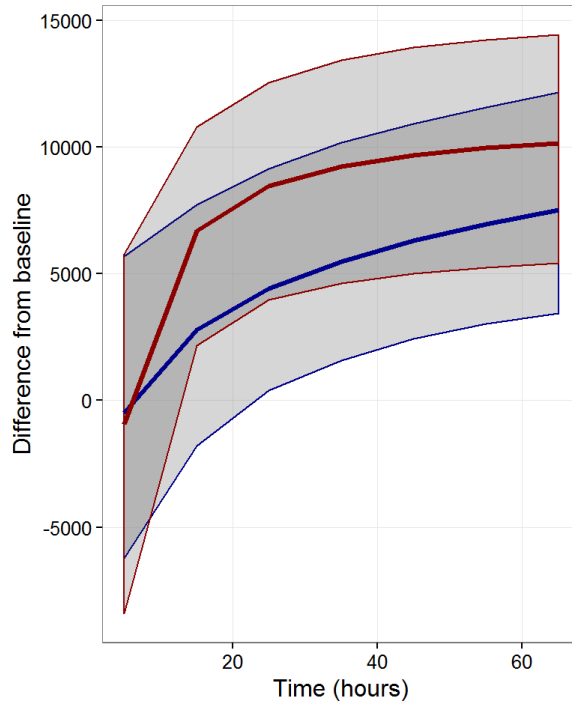

### White cell count

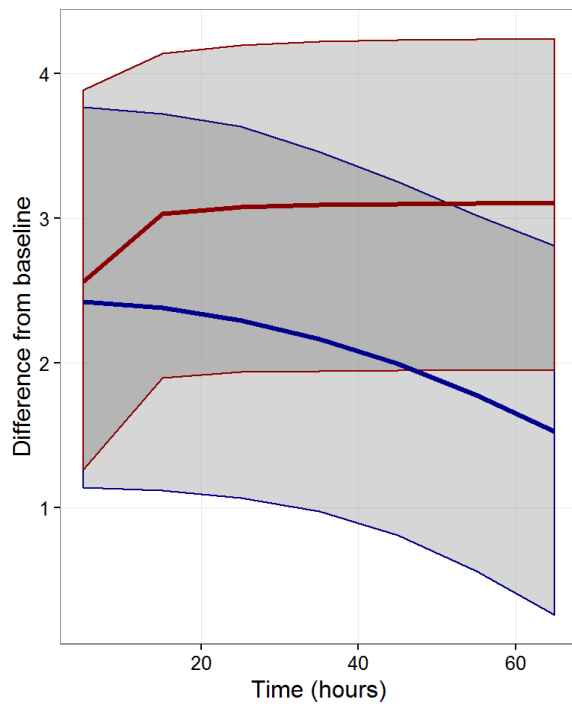

### Complement C1q

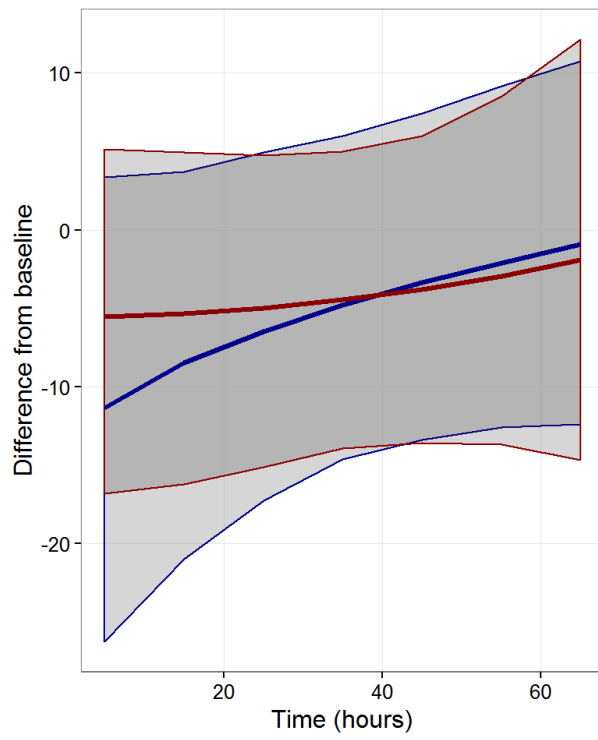

### Complement C2

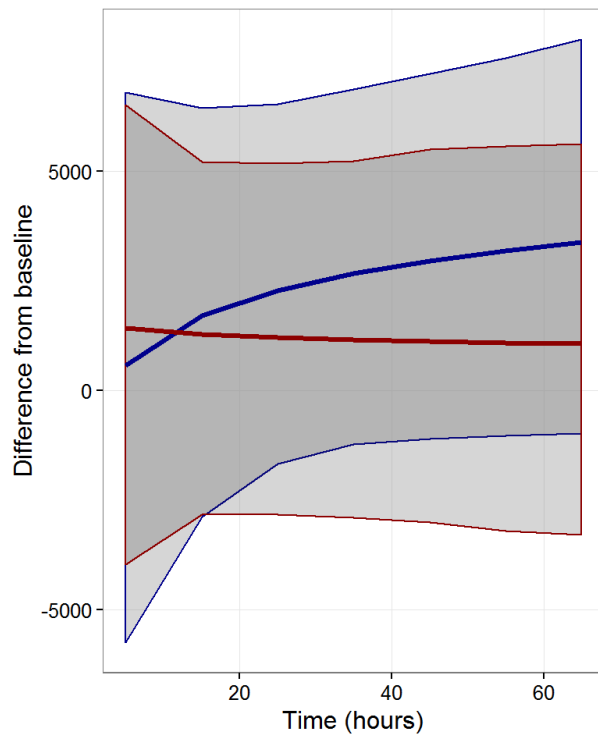

### Complement C3

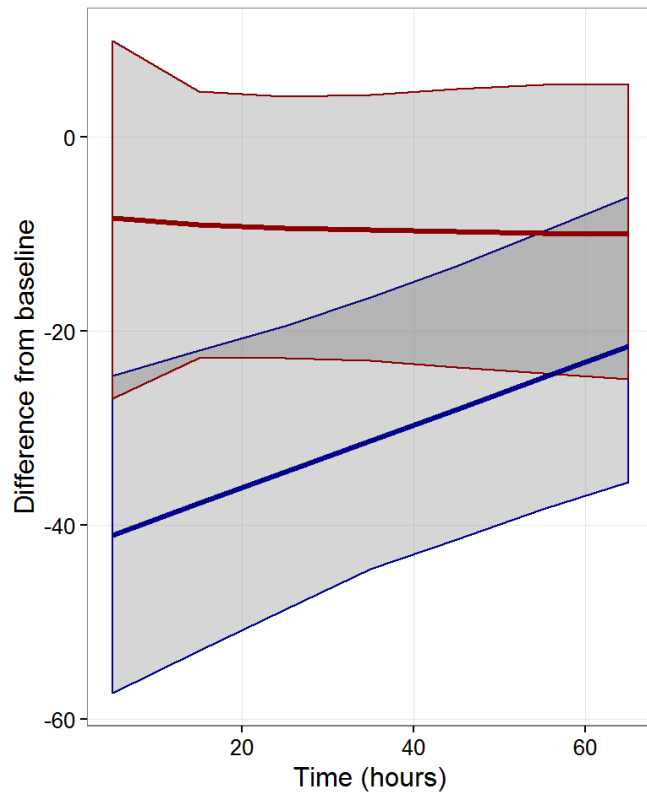

### Complement C3b/iC3b

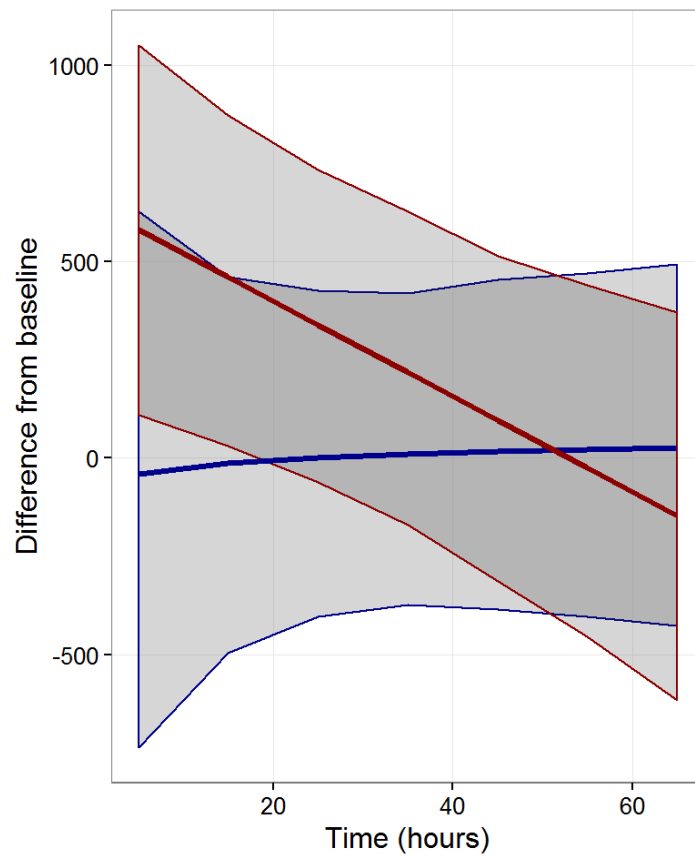



### Complement C4

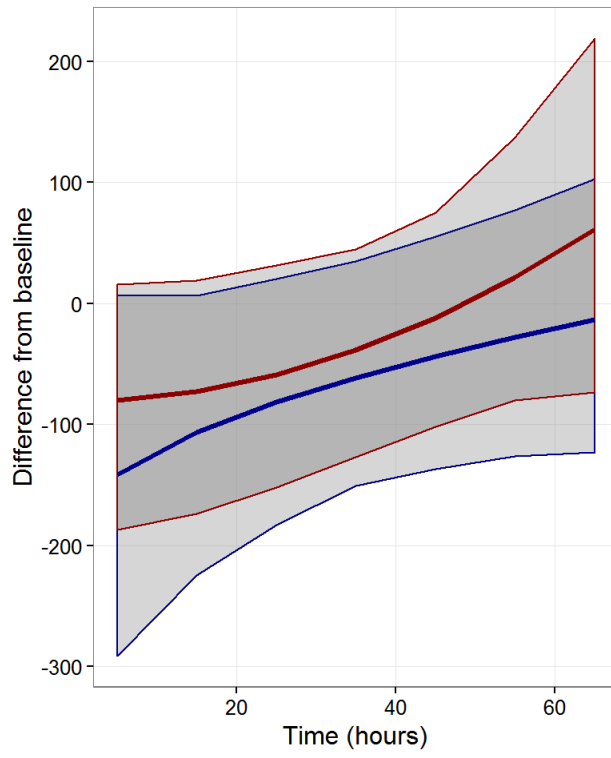

### Complement C4b

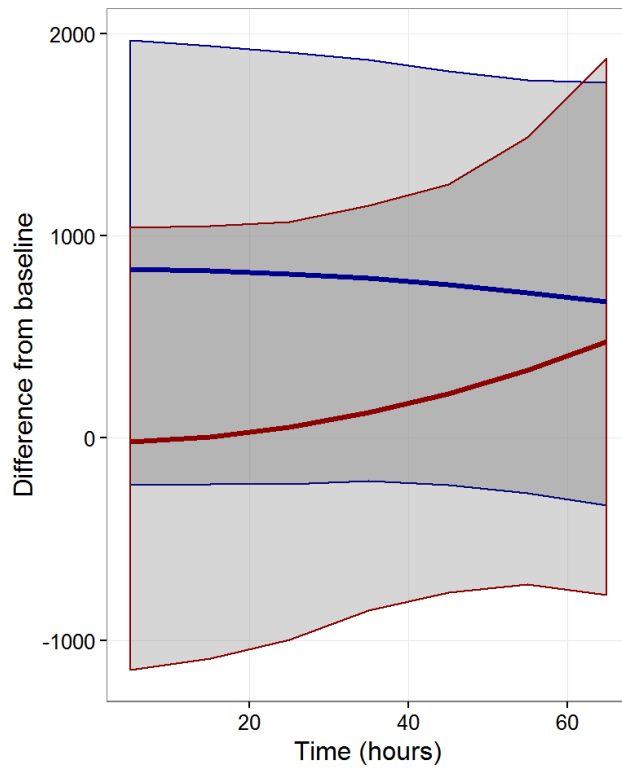

### Complement C5

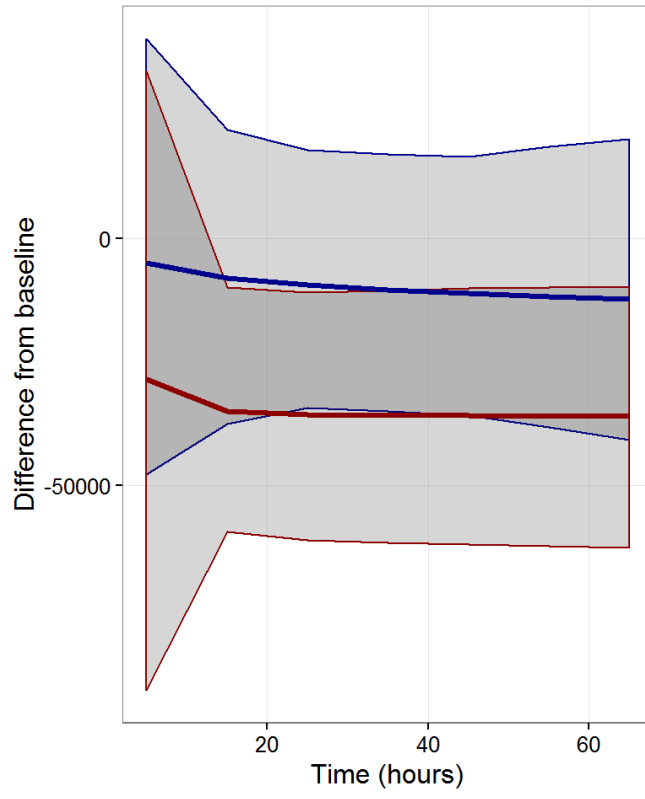

### Complement C5a

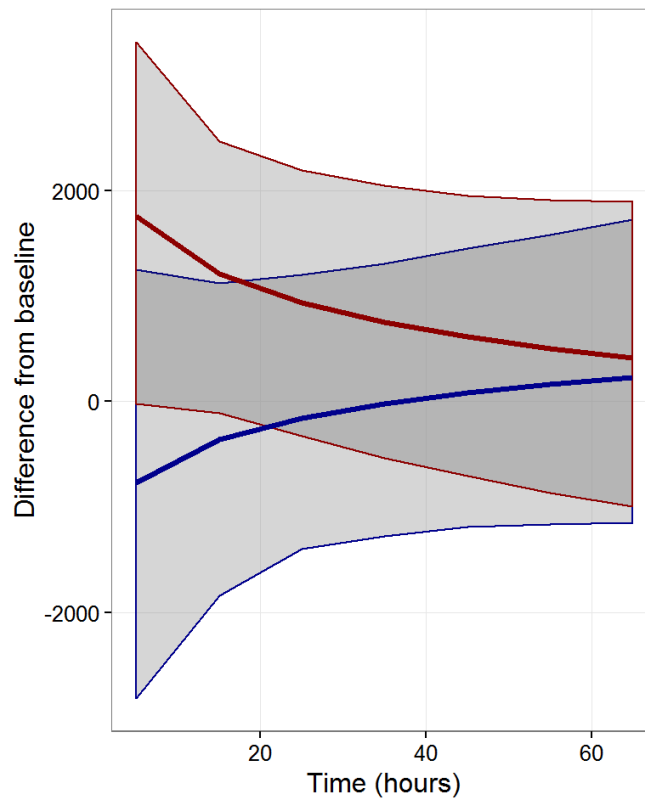

### Complement C9

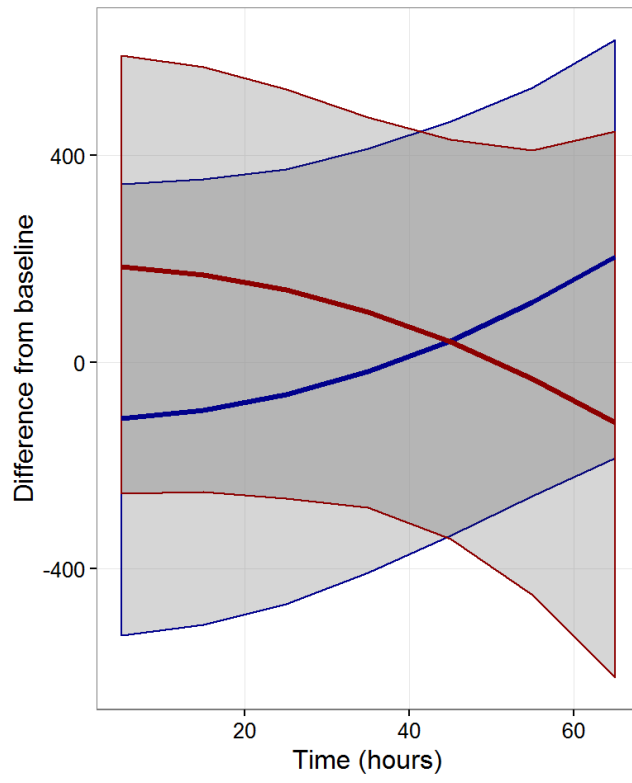

### Factor D

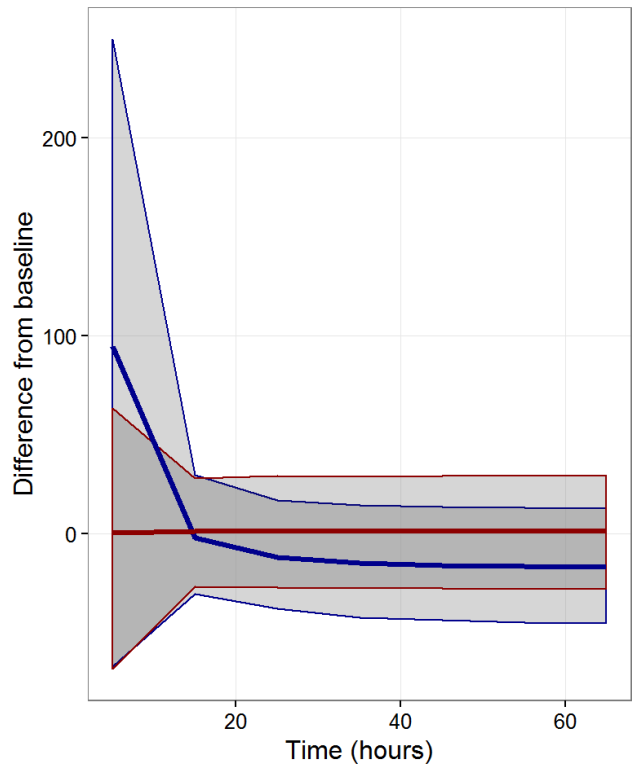

## Mannose Binding Lectin

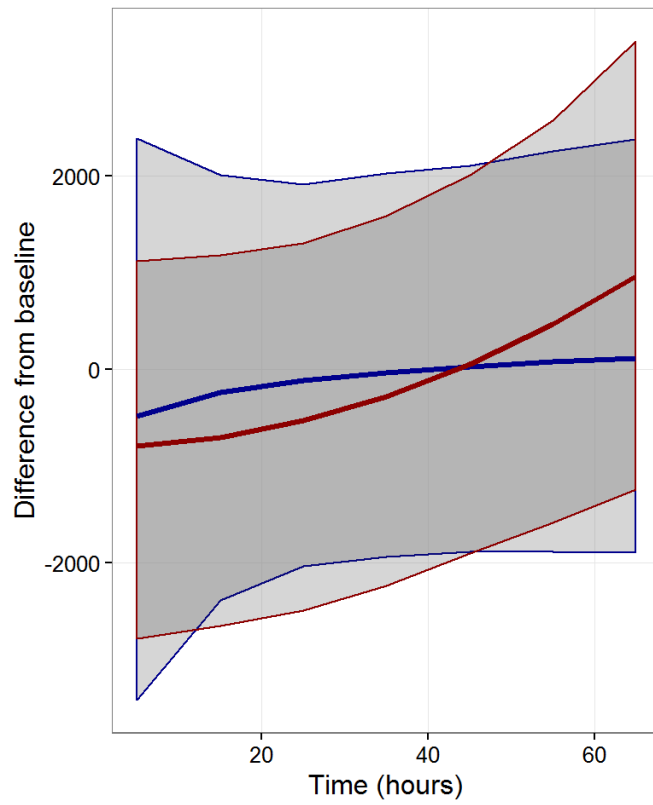

## Factor I

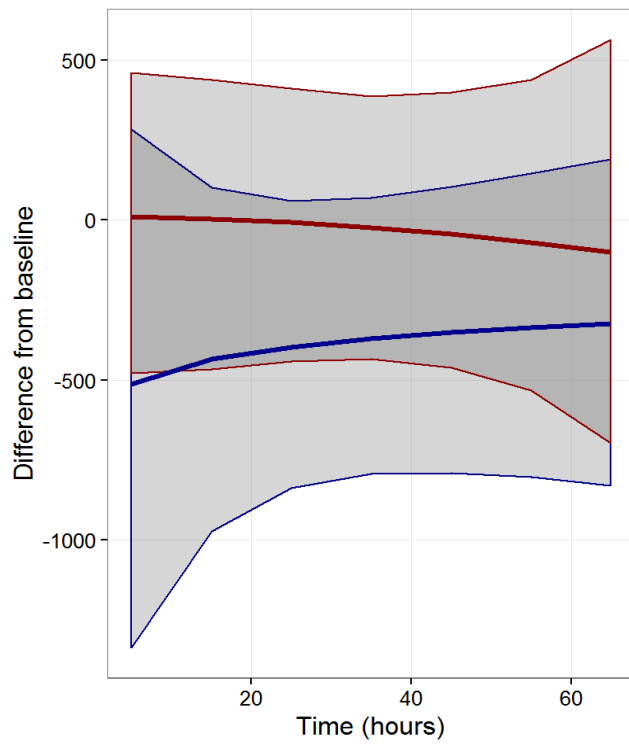

### Factor B

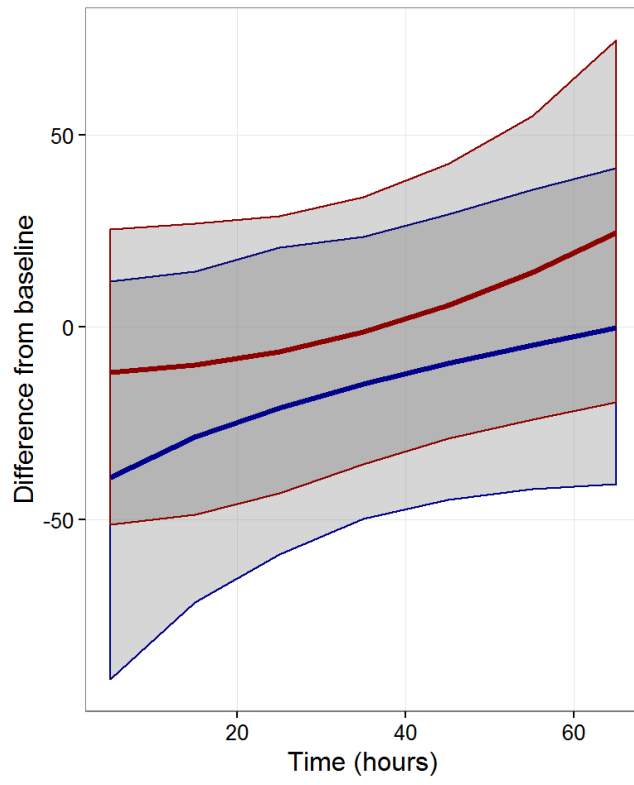

### Factor H

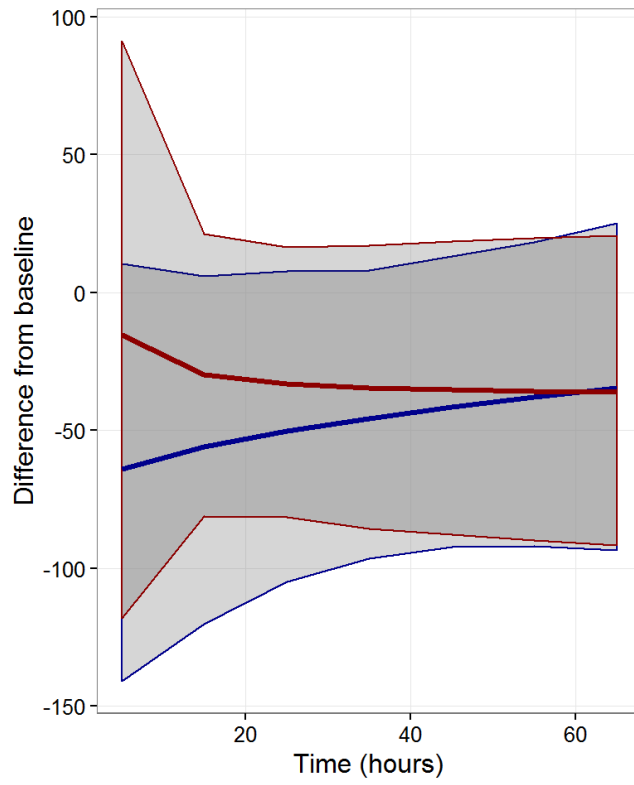

## Properdin

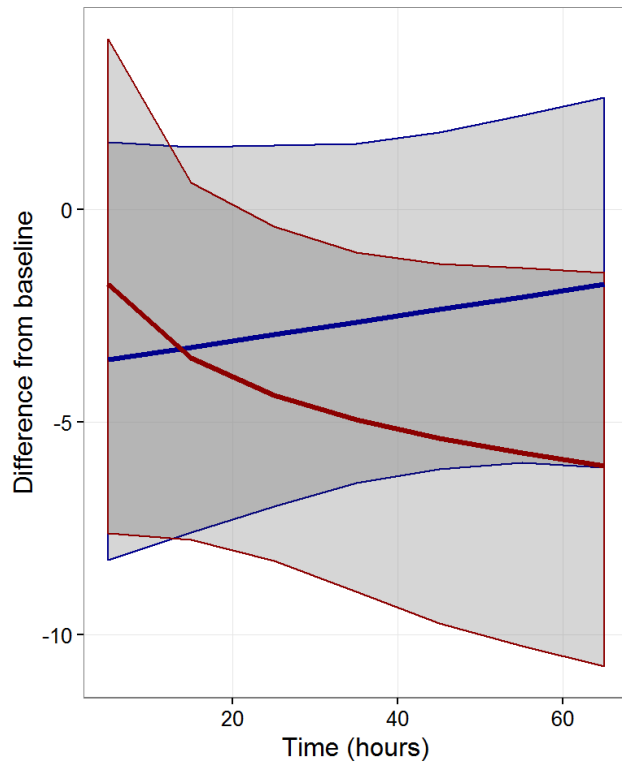

## Eotaxin

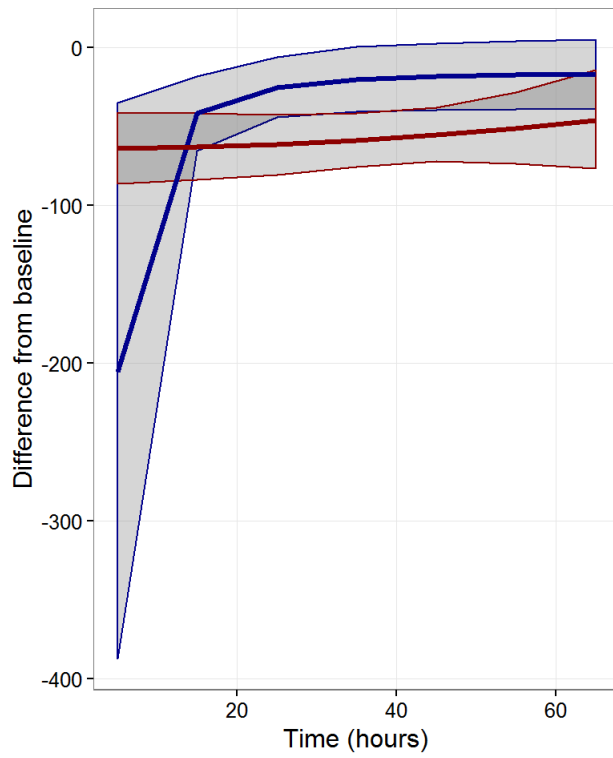

### GM-CSF

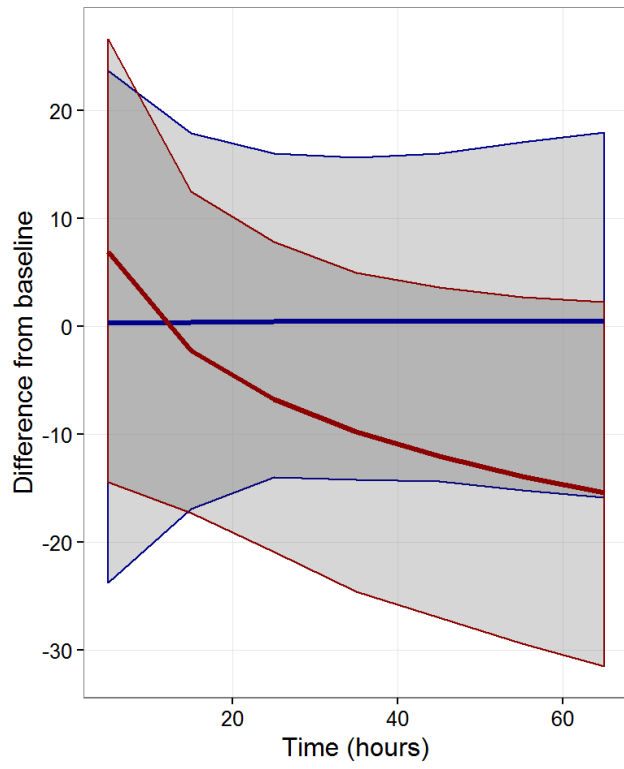

### IFN $\alpha_2$

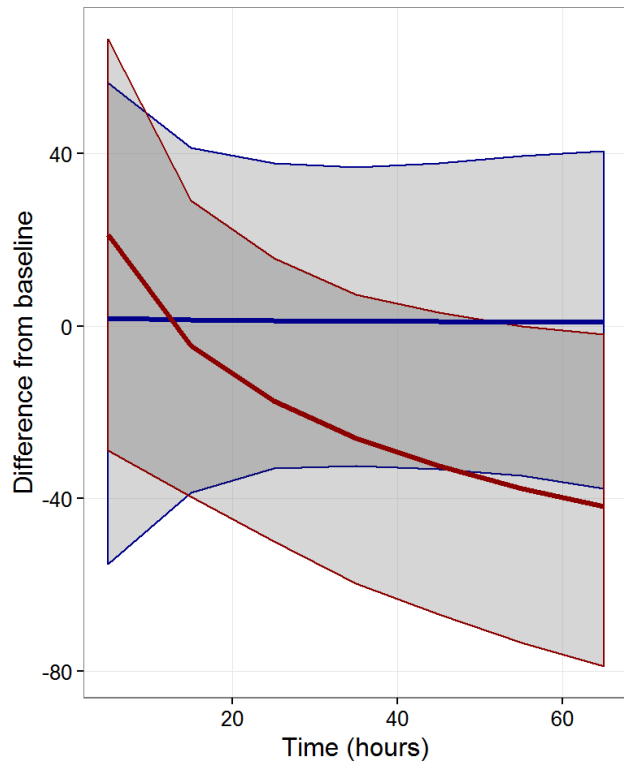

### Interferon $\gamma$

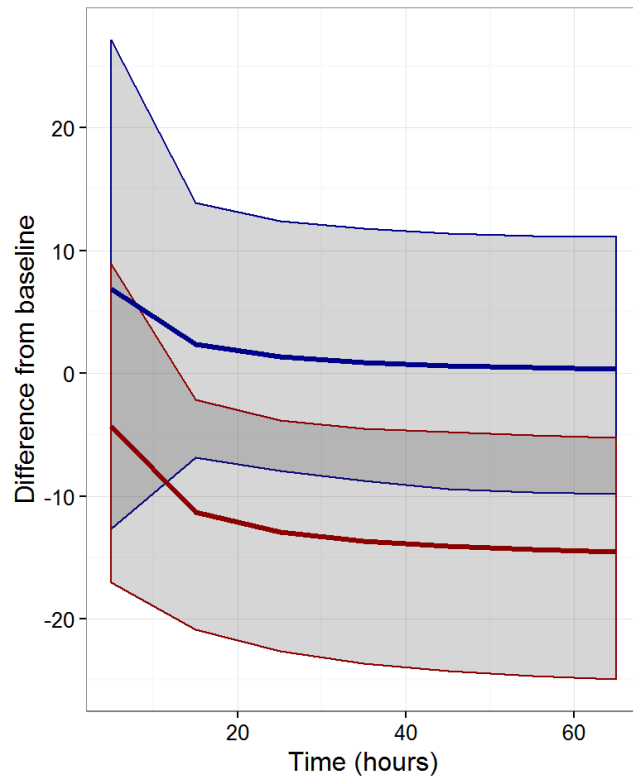

### IL-10

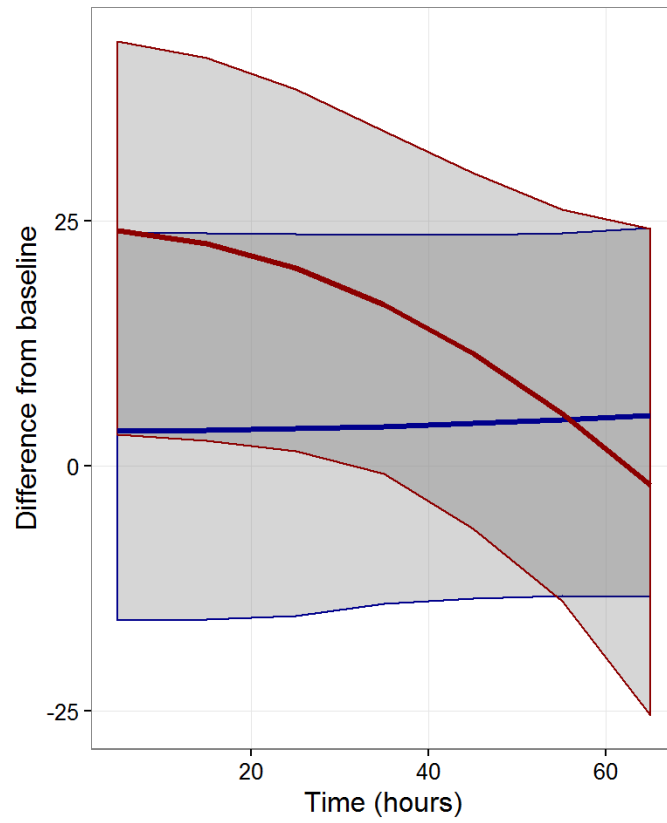



### IL-12p40

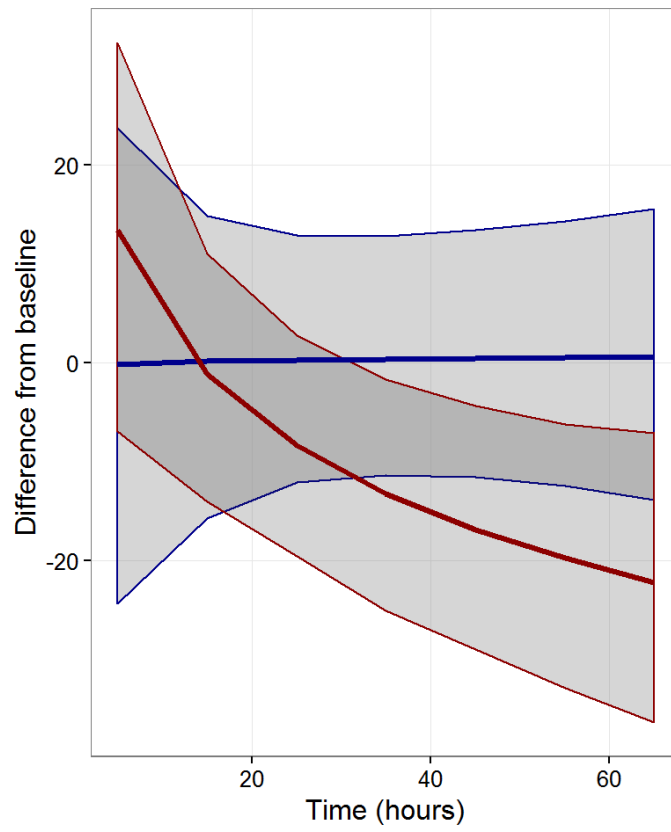

### IL-12p70

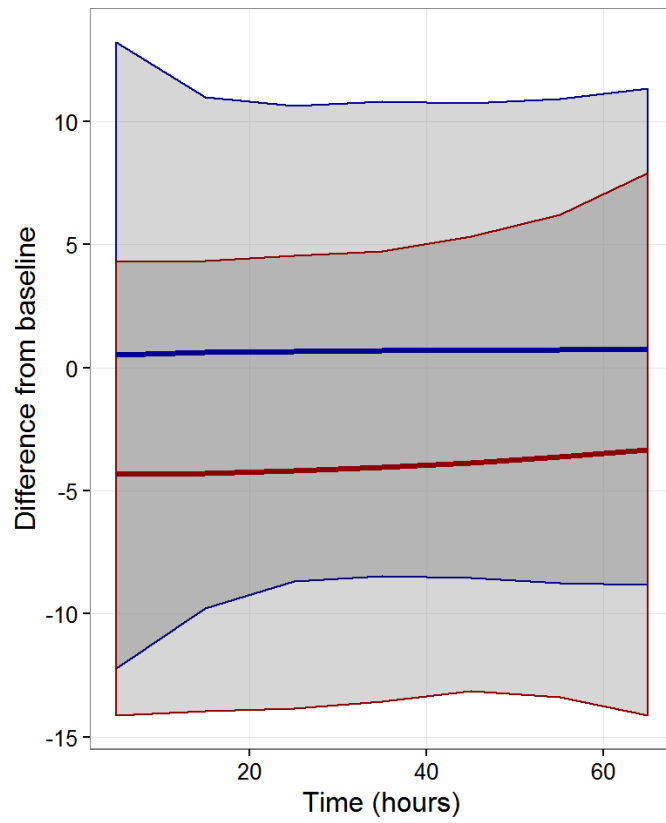

### IL-13

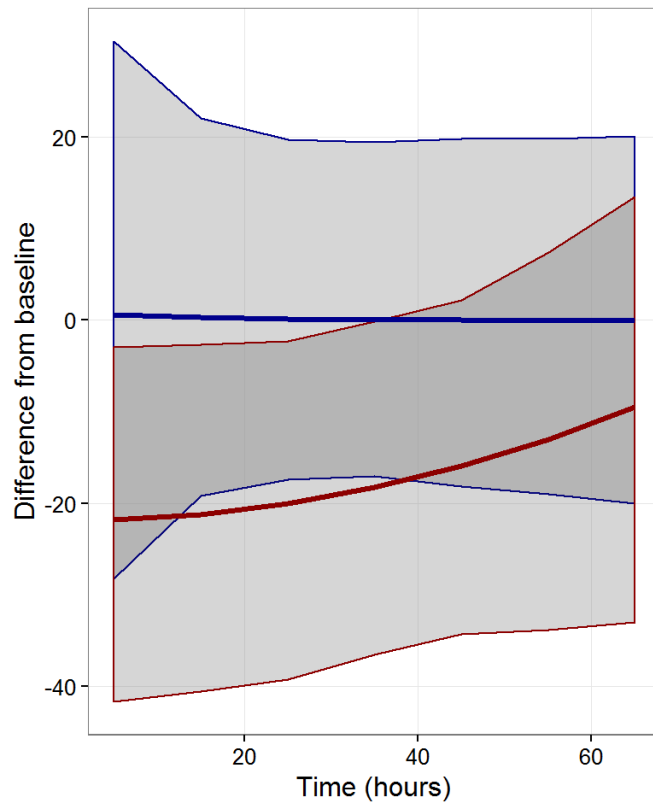

### IL-15

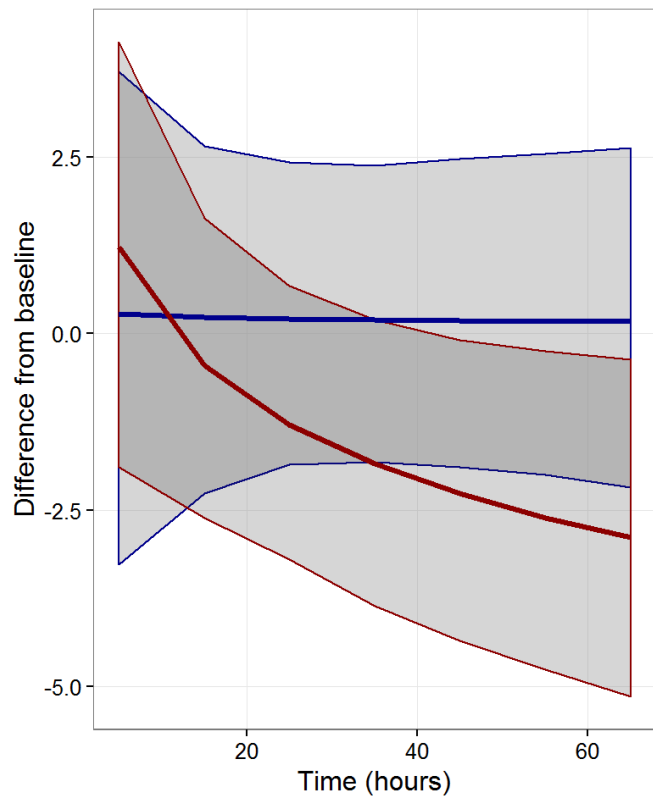

### IL-17

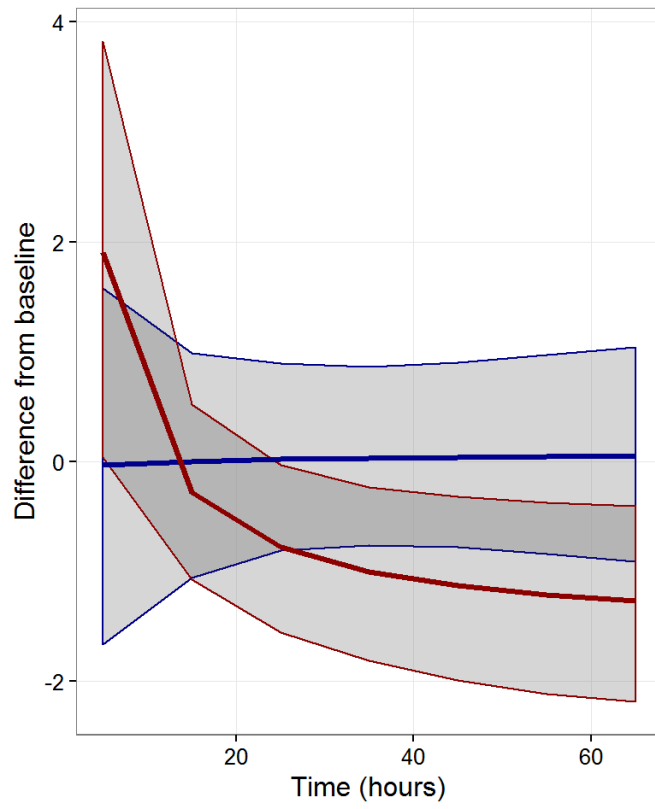

### IL-1 $\alpha$

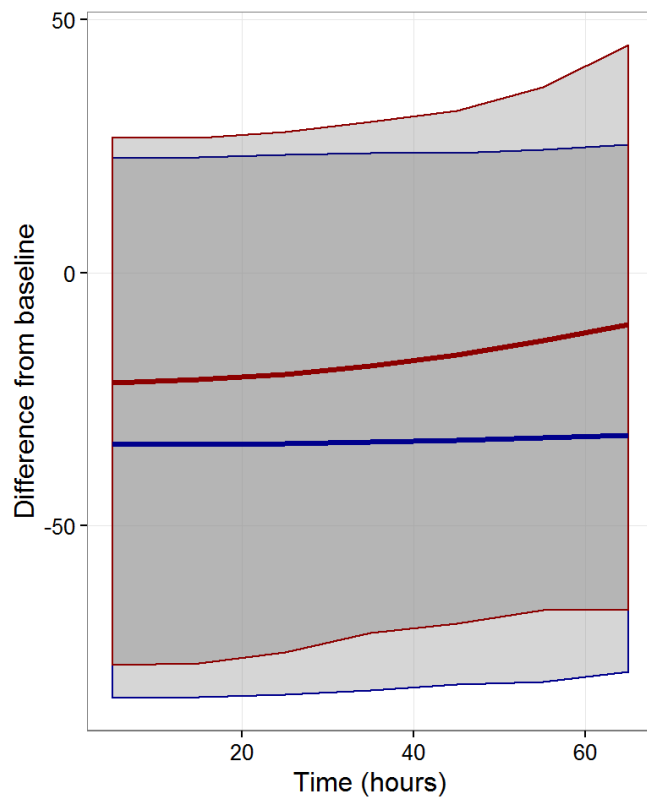

### IL-1b

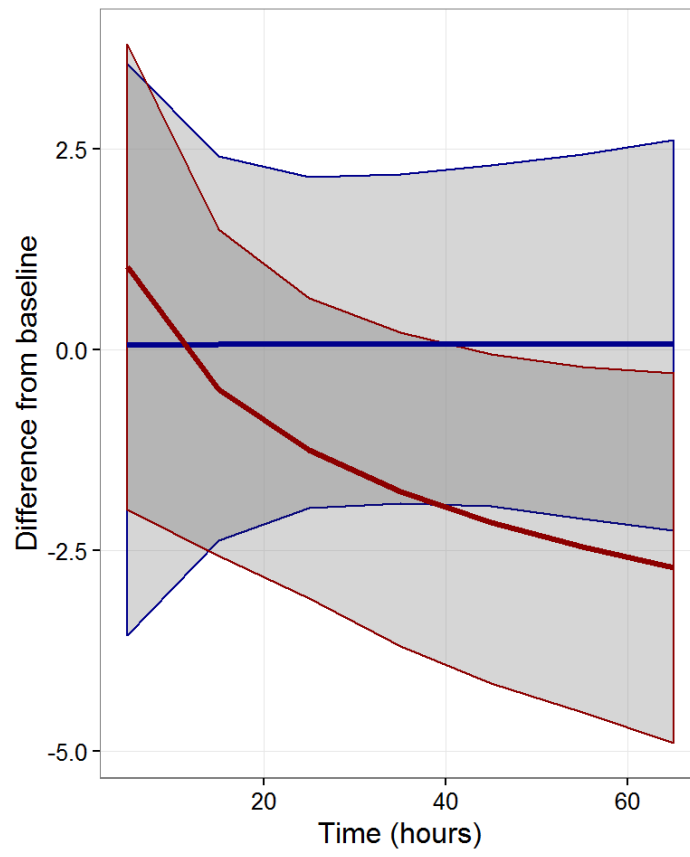

### IL-2

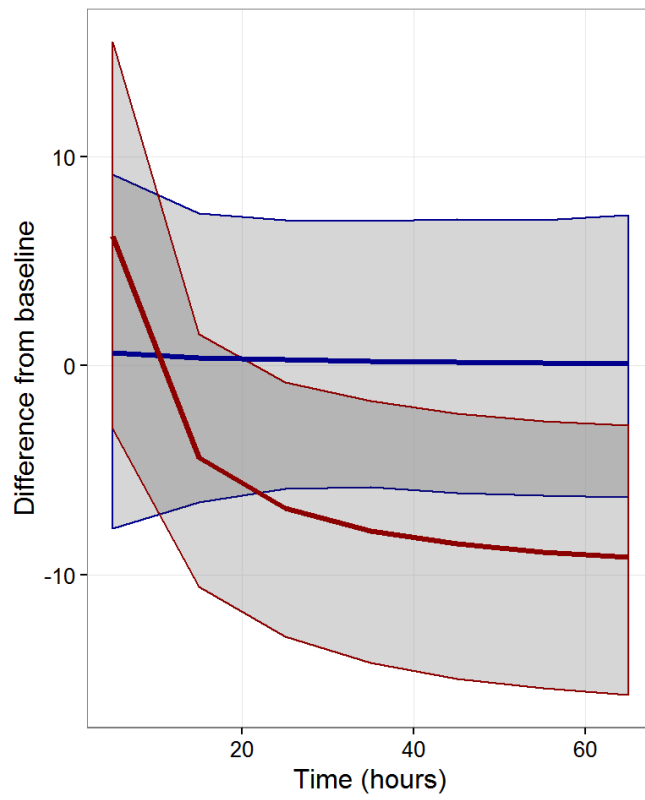

### IL-4

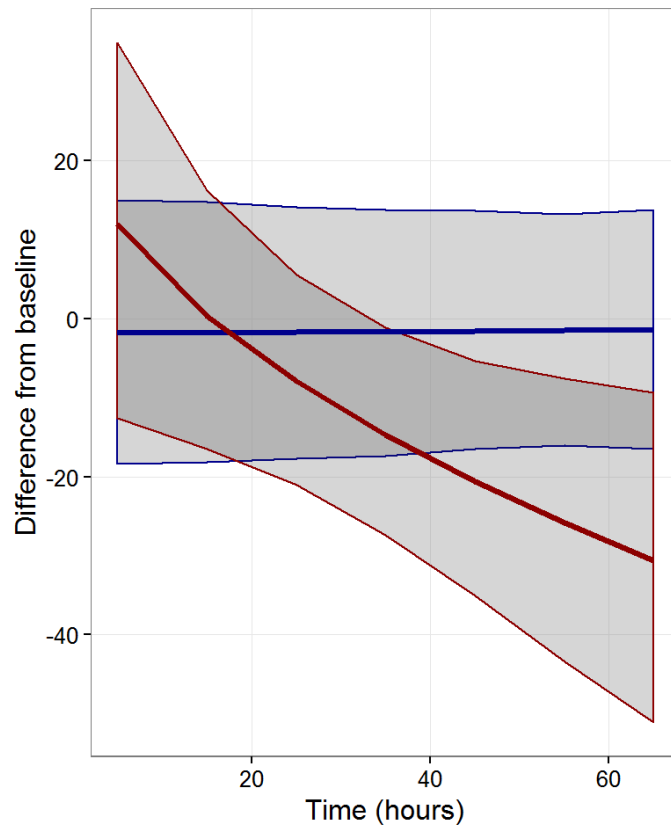

### IL-5

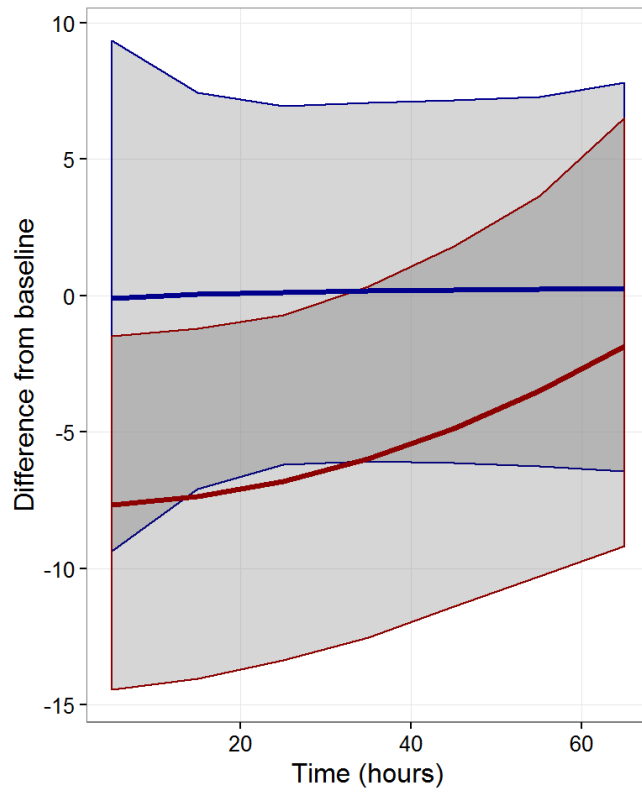

### IL-6

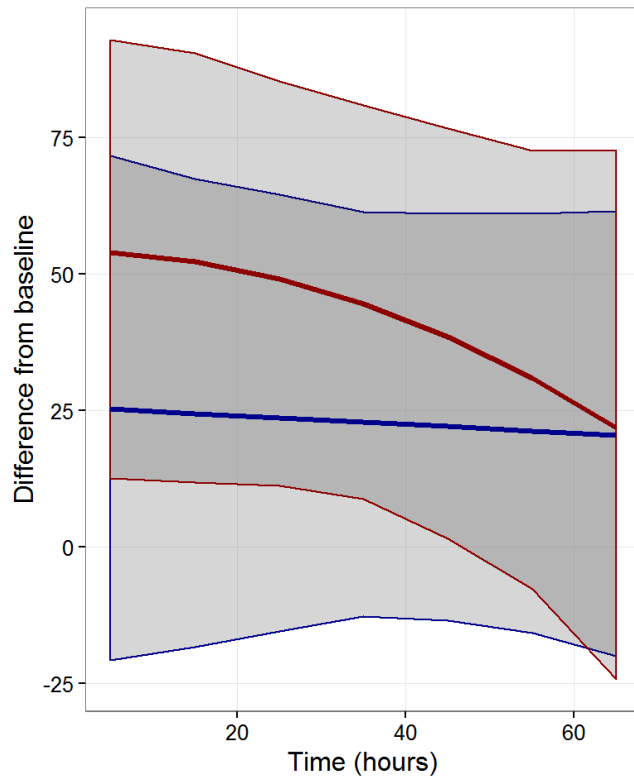

### IL-7

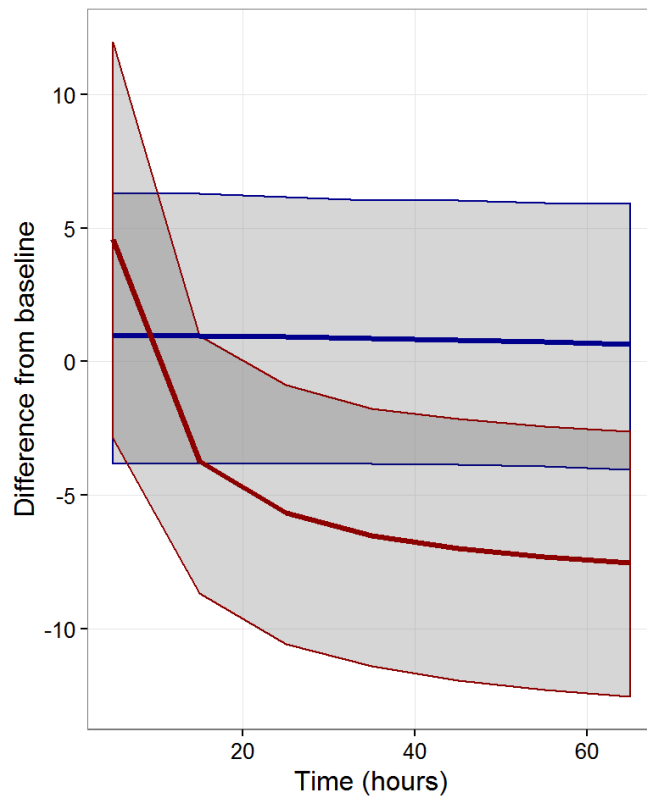

### IL-8

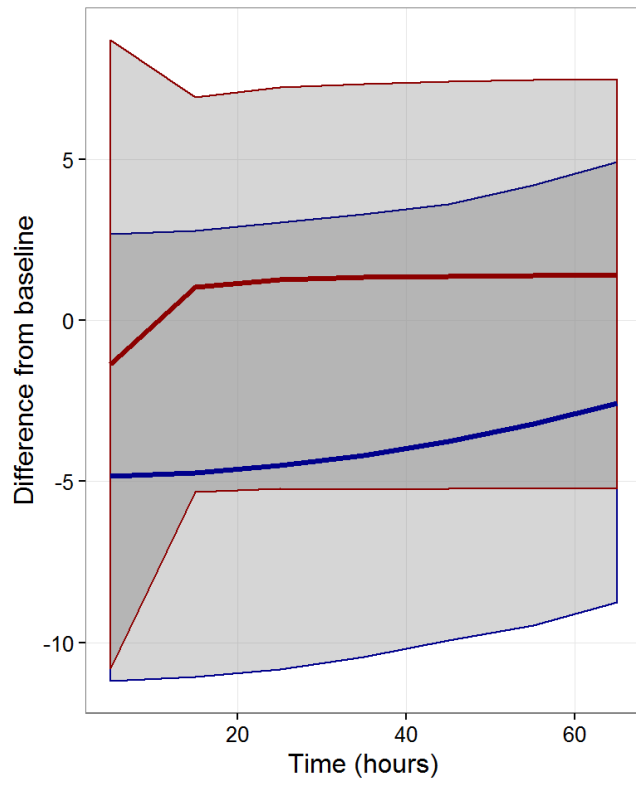

### IP-10

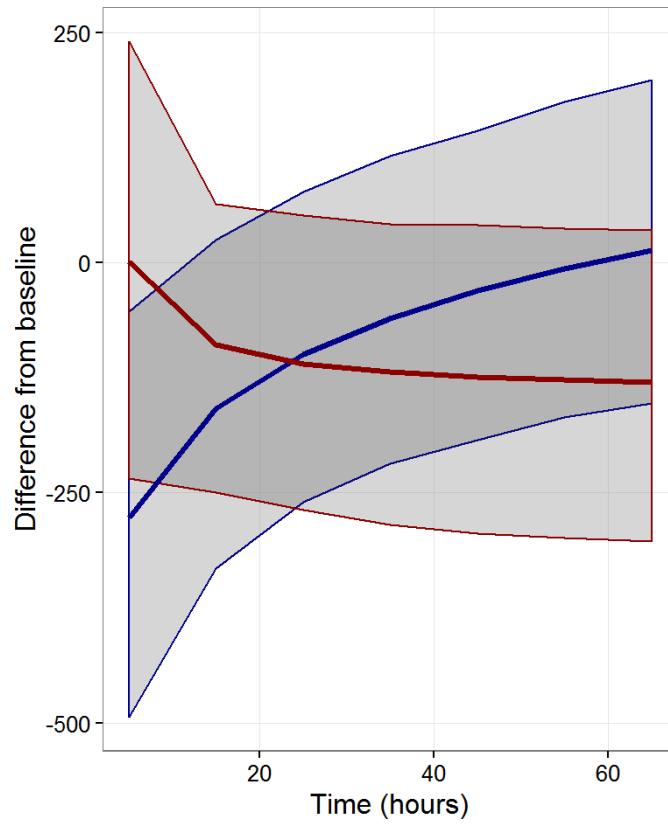

### MCP-1

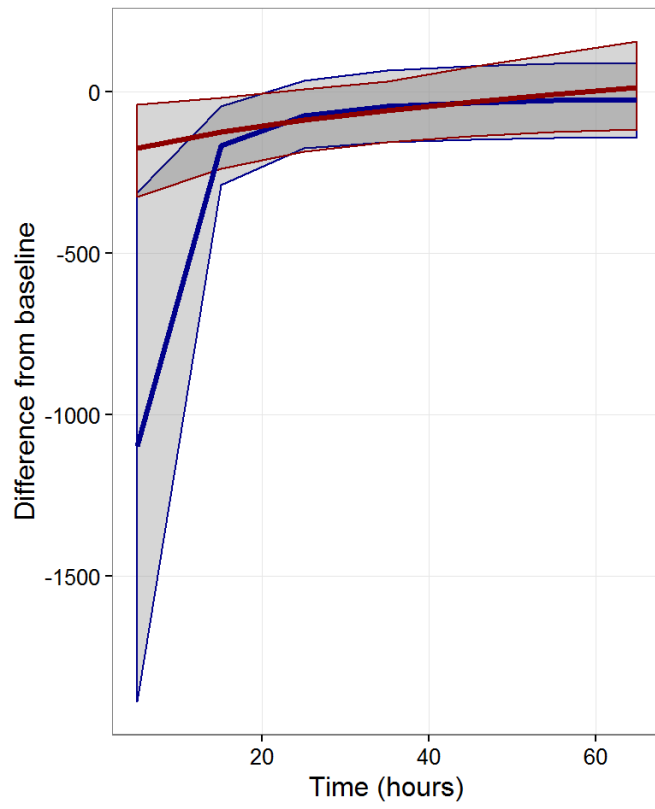

### MIP-1a

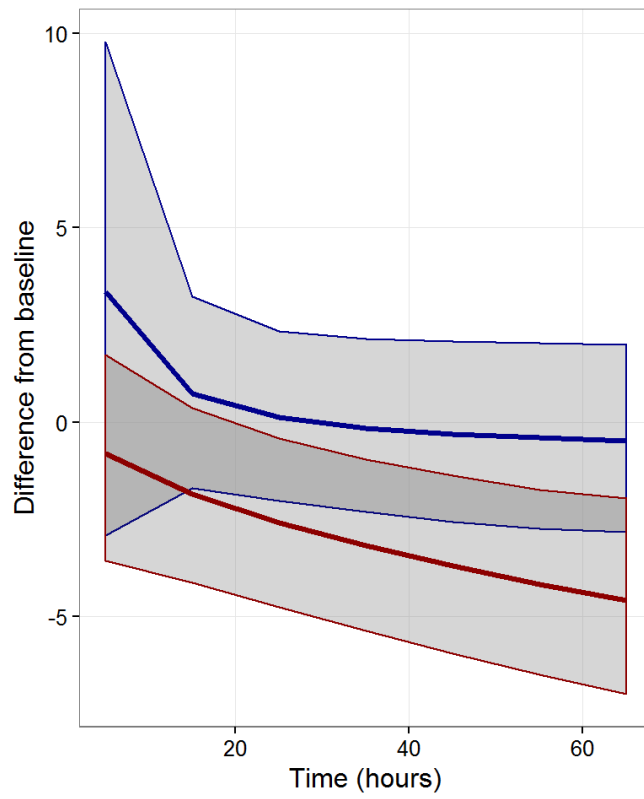



### MIP-1b

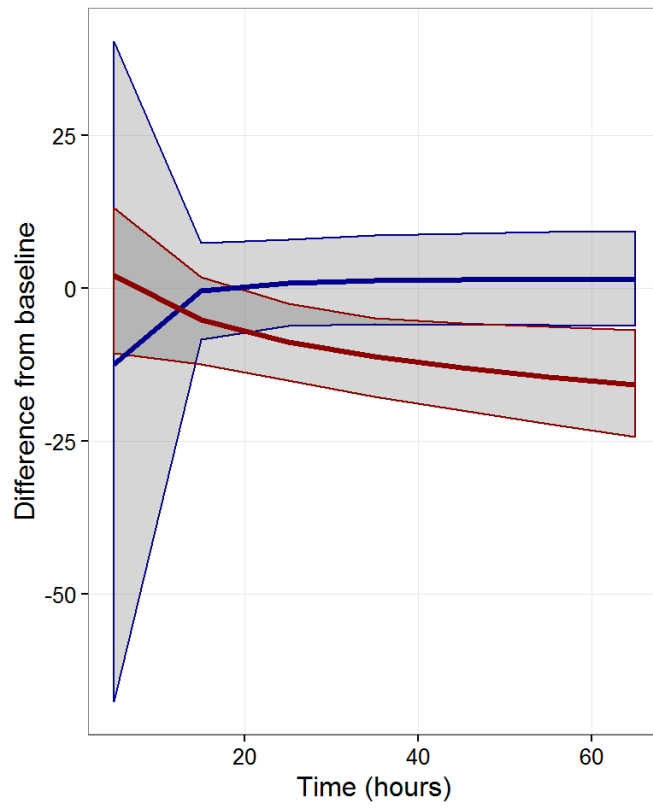

### TNF $\alpha$

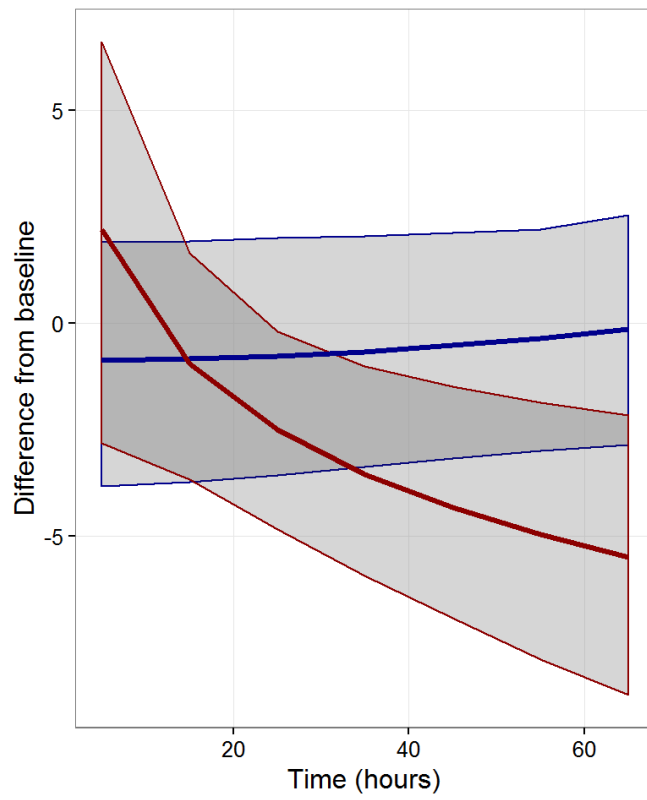

## Matrix Metalloproteinase 9

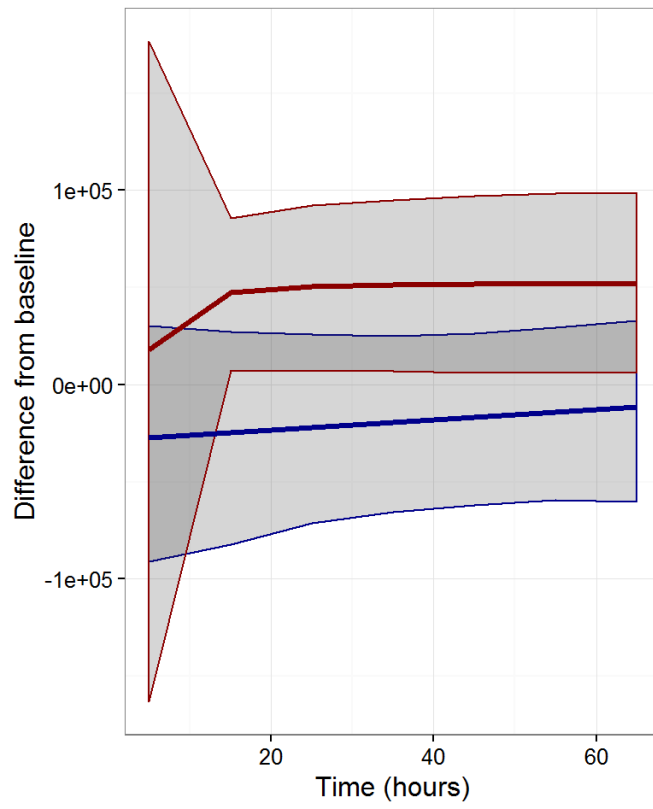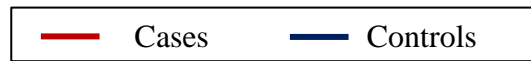

Supplement: Supplementary_material_V2.pdf [file Supplementary_material_V2.pdf]
